# Supplementary material
Source: PubMed Central journal article supplement (PMC3666784)
Supplement: JCM.03062-12_zjm999092381so1.pdf [file JCM.03062-12_zjm999092381so1.pdf]

1 Supplemental Table 1. Cross-reactivity panel  
2

| Organism                       | Source      | Quantity      |
|--------------------------------|-------------|---------------|
| <i>Enterobacter cloacae</i>    | ATCC 13047  | 0.5 McFarland |
| <i>Serratia marcescens</i>     | ATCC 8100   | 0.5 McFarland |
| <i>Klebsiella oxytoca</i>      | ATCC 700324 | 0.5 McFarland |
| <i>Klebsiella pneumoniae</i>   | ATCC 700603 | 0.5 McFarland |
| <i>Citrobacter freundii</i>    | ATCC 8090   | 0.5 McFarland |
| <i>Proteus mirabilis</i>       | ATCC 35659  | 0.5 McFarland |
| <i>Escherichia coli</i>        | ATCC 25922  | 0.5 McFarland |
| <i>Morganella morganii</i>     | CAP D-5-79  | 0.5 McFarland |
| <i>Acinetobacter baumannii</i> | ATCC 19606  | 0.5 McFarland |
| <i>Pseudomonas aeruginosa</i>  | ATCC 27853  | 0.5 McFarland |
| <i>Staphylococcus aureus</i>   | BAA-977     | 0.5 McFarland |
| <i>Enterococcus faecalis</i>   | ATCC 51299  | 0.5 McFarland |

3  
4

## 5 Supplemental Table 2. Isolate description

6

| Mayo Clinic Isolates (n = 57)       |                           |                           |                                                                |
|-------------------------------------|---------------------------|---------------------------|----------------------------------------------------------------|
| Organism                            | <i>bla</i> <sub>KPC</sub> | <i>bla</i> <sub>NDM</sub> | Neither <i>bla</i> <sub>KPC</sub> or <i>bla</i> <sub>NDM</sub> |
| <i>Acinetobacter baumannii</i>      | 0                         | 0                         | 1                                                              |
| <i>Aeromonas</i> species            | 0                         | 0                         | 1                                                              |
| <i>Citrobacter freundii</i>         | 0                         | 0                         | 1                                                              |
| <i>Enterobacter aerogenes</i> (2)   | 0                         | 0                         | 2                                                              |
| <i>Enterobacter cloacae</i> (8)     | 4                         | 0                         | 4                                                              |
| <i>Escherichia coli</i> (3)         | 1                         | 1                         | 1                                                              |
| <i>Klebsiella pneumoniae</i> (34)   | 25                        | 2                         | 7                                                              |
| <i>Klebsiella oxytoca</i>           | 0                         | 0                         | 1                                                              |
| <i>Morganella morganii</i>          | 0                         | 0                         | 1                                                              |
| <i>Proteus mirabilis</i>            | 0                         | 0                         | 1                                                              |
| <i>Pseudomonas aeruginosa</i> (2)   | 0                         | 0                         | 2                                                              |
| <i>Serratia marcescens</i> (2)      | 0                         | 0                         | 2                                                              |
| HPA Laboratory Isolates (n = 101)   |                           |                           |                                                                |
| Organism                            | <i>bla</i> <sub>KPC</sub> | <i>bla</i> <sub>NDM</sub> | Neither <i>bla</i> <sub>KPC</sub> or <i>bla</i> <sub>NDM</sub> |
| <i>Acinetobacter baumannii</i> (10) | 0                         | 10                        | 0                                                              |
| <i>Citrobacter freundii</i> (2)     | 0                         | 2                         | 0                                                              |
| <i>Enterobacter</i> species (9)     | 0                         | 9                         | 0                                                              |
| <i>Escherichia coli</i> (21)        | 0                         | 21                        | 0                                                              |
| <i>Klebsiella pneumoniae</i> (51)   | 0                         | 51                        | 0                                                              |
| <i>Klebsiella</i> species (4)       | 0                         | 4                         | 0                                                              |
| <i>Morganella morganii</i>          | 0                         | 1                         | 0                                                              |
| <i>Providencia</i> species          | 0                         | 1                         | 0                                                              |
| <i>Pseudomonas</i> species          | 0                         | 1                         | 0                                                              |
| <i>Serratia marcescens</i>          | 0                         | 1                         | 0                                                              |

7

8
